# Supplementary material
Source: publisher figshare collection journal article supplement (https://gsajournals.figshare.com/articles/dataset/_/14183207)
Supplement: Supplementary file 1 [file 1]

**Table S2. ChIRP probe sequences.**

-The names and sequences of the 8 probes used in the ChIRP experiment. The production numbers from Bioresearch Technologies are provided for reference and the probe modification was biotin on the 3' end. Published protocols recommend 1 probe per 200–400 nt of RNA, and avoiding sequences that contain homology to other RNAs.

| <b>Probe names</b> | <b>Sequence</b>        | <b>Modification</b> |
|--------------------|------------------------|---------------------|
| Probe 1            | aaattgtctgggtgacgatttg | Biotin              |
| Probe 2            | aaggaaggatctagattgcga  | Biotin              |
| Probe 3            | ccaaacataccaggcattaaaa | Biotin              |
| Probe 4            | tattttgaaatgatggtggcc  | Biotin              |
| Probe 5            | tctgaagttttccactcaactc | Biotin              |
| Probe 6            | gatttctttgtcaatttcagc  | Biotin              |
| Probe 7            | ctatccaaccacctaataaat  | Biotin              |
| Probe 8            | atagagttatttcgggaactgt | Biotin              |
