# Supplementary material
Source: publisher figshare collection journal article supplement (https://gsajournals.figshare.com/articles/dataset/_/14183207)
Supplement: Supplementary file 2 [file 1]

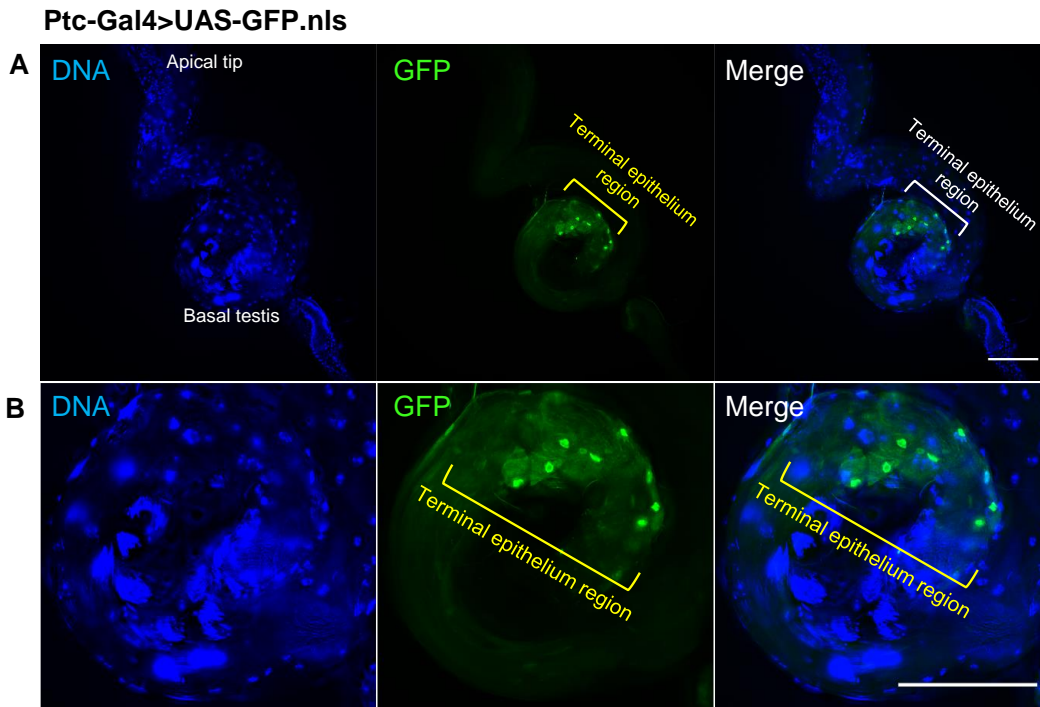

**Figure S2. Ptc-Gal4 expression pattern.** (A) Confocal imaging showing the expression pattern of testis dissected from *Ptc-Gal4>UAS-GFP.nls* flies. (B) Enlarged inset of Panel A. Scale bar: 100  $\mu$ m.
