# Supplementary material
Source: publisher figshare collection journal article supplement (https://gsajournals.figshare.com/articles/dataset/_/14183207)
Supplement: Supplementary file 3 [file 1]

**Table S1. Fly lines.**

| <b>Bloomington Stock ID#</b> | <b>Genotype</b>                                                                       | <b>Description</b>  |
|------------------------------|---------------------------------------------------------------------------------------|---------------------|
| 28794                        | y[1] v[1]; P{y[+t7.7] v[+t1.8]=TRiP.JF03222}attP2/TM3, Sb[1]                          | Obp44a RNAi         |
| 31549                        | y[1] v[1]; P{y[+t7.7] v[+t1.8]=TRiP.JF01111}attP2                                     | Prm RNAi            |
| 34742                        | y[1] sc[*] v[1] sev[21]; P{y[+t7.7] v[+t1.8]=TRiP.HMS01222}attP2                      | Chc RNAi            |
| 34865                        | y[1] sc[*] v[1] sev[21]; P{y[+t7.7] v[+t1.8]=TRiP.HMS00184}attP2/TM3, Sb[1]           | Tudor-SN RNAi       |
| 34963                        | y[1] sc[*] v[1] sev[21]; P{y[+t7.7] v[+t1.8]=TRiP.HMS00630}attP2                      | Mp20 RNAi           |
| 34670                        | P{TRiP.HMS01148}attP2                                                                 | Rab1 RNAi           |
| 56932                        | y[1] sc[*] v[1] sev[21]; P{y[+t7.7] v[+t1.8]=TRiP.HMC04371}attP40                     | alpha-Spec RNAi     |
| 42802                        | y[1] v[1]; P{y[+t7.7] v[+t1.8]=TRiP.GL01174}attP2                                     | beta-Spec RNAi      |
| 60347                        | y[1] v[1]; P{y[+t7.7] v[+t1.8]=TRiP.HMJ22488}attP40                                   | Act88F RNAi         |
| 63994                        | y[1] v[1]; P{y[+t7.7] v[+t1.8]=TRiP.HMJ30307}attP40/CyO                               | Mitofilin RNAi      |
| 64858                        | y[1] sc[*] v[1] sev[21]; P{y[+t7.7] v[+t1.8]=TRiP.HMC05731}attP40                     | betaTub97EF RNAi    |
| 77376                        | y[1] sc[*] v[1] sev[21]; P{y[+t7.7] v[+t1.8]=TRiP.HMC06507}attP40                     | Tm1 RNAi            |
| 2017                         | w[*]; P{w[+mW.hs]=GawB}ptc[559.1]                                                     | Cyst cell driver    |
| 58447                        | w[*]; TI{w[+mW.hs]=TI}Pkd2[ko67], P{w[+mC]=protamineB-eGFP}2/CyO; P{w[+mC]=dj-GFP.S}3 | Sperm tail reporter |
| Gift from Thomas Wilson      | w1118                                                                                 | Wild type control   |
