# Supplementary material
Source: publisher figshare collection journal article supplement (https://gsajournals.figshare.com/articles/dataset/_/14183207)
Supplement: Supplementary file 4 [file 1]

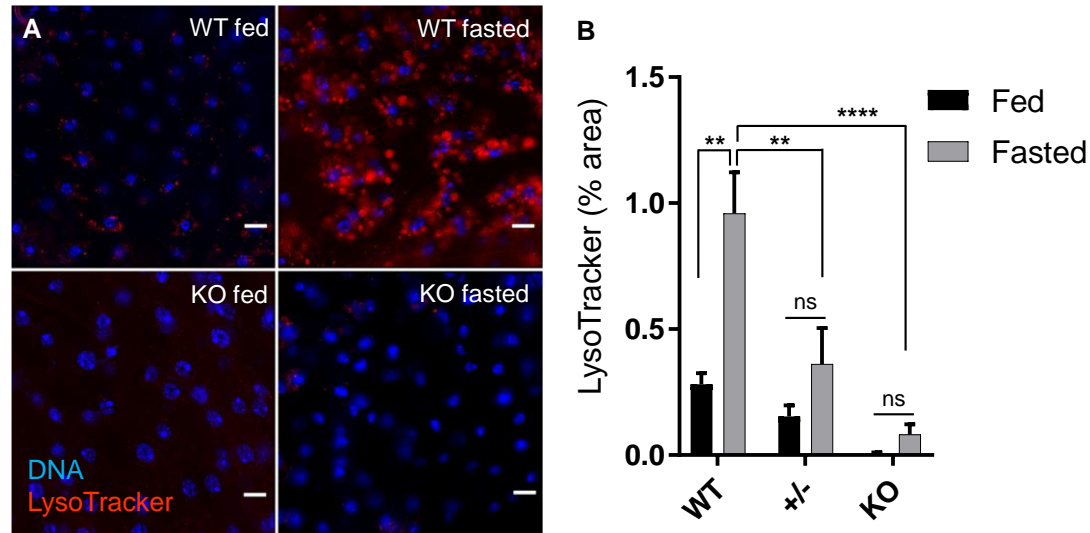

**Figure S1. Deletion of lncRNA CR45362 reduces lysosome activity.** (A) LysoTracker staining of fat body dissected from WT and *CR45362*<sup>KO</sup> flies upon fasting. Scale bar: 10 μm. (B) Quantification of LysoTracker staining of Panel (A). Sample size n=7, 12, 6, 7, 6, 8 (from left to right). Two-way ANOVA, \*\* p<0.01, \*\*\*\* p<0.0001, ns: not significant.
