# Supplementary material
Source: publisher figshare collection journal article supplement (https://gsajournals.figshare.com/articles/dataset/_/14183207)
Supplement: Supplementary file 5 [file 1]

**Table S3. ChIRP-MS data table.**

| <b>Gene Symbol</b> | <b>KO hits</b> | <b>WT hits<br/>Even probes</b> | <b>WT hits<br/>Odd probes</b> | <b>WT hits<br/>Average</b> | <b>Fold change<br/>(WT vs.<br/>KO)</b> |
|--------------------|----------------|--------------------------------|-------------------------------|----------------------------|----------------------------------------|
| Act88F             | 0              | 73                             | 18                            | 46                         | /                                      |
| Prm                | 0              | 28                             | 9                             | 18                         | /                                      |
| Mf                 | 0              | 7                              | 17                            | 12                         | /                                      |
| Mfe2               | 0              | 18                             | 6                             | 12                         | /                                      |
| CT9894/CG2918      | 0              | 16                             | 3                             | 10                         | /                                      |
| beta-Spec          | 0              | 15                             | 3                             | 9                          | /                                      |
| Tudor-SN           | 0              | 15                             | 2                             | 9                          | /                                      |
| Actn               | 0              | 16                             | 1                             | 9                          | /                                      |
| Chc                | 0              | 14                             | 2                             | 8                          | /                                      |
| Aldh-III           | 0              | 13                             | 2                             | 8                          | /                                      |
| Rab1               | 0              | 13                             | 2                             | 7                          | /                                      |
| mfas               | 0              | 11                             | 2                             | 7                          | /                                      |
| Cyp6d5             | 0              | 10                             | 3                             | 6                          | /                                      |
| RpS9               | 0              | 10                             | 3                             | 6                          | /                                      |
| zip                | 0              | 13                             | 0                             | 6                          | /                                      |
| RpL18A             | 0              | 10                             | 2                             | 6                          | /                                      |
| Dip-B              | 0              | 8                              | 4                             | 6                          | /                                      |
| Gpo1               | 0              | 11                             | 1                             | 6                          | /                                      |
| Acsl               | 0              | 10                             | 2                             | 6                          | /                                      |
| ATPsynB            | 0              | 10                             | 2                             | 6                          | /                                      |
| Fim                | 0              | 9                              | 2                             | 6                          | /                                      |
| Mitofilin          | 0              | 8                              | 3                             | 5                          | /                                      |
| Myo61F             | 0              | 11                             | 0                             | 5                          | /                                      |
| ND-39              | 0              | 11                             | 0                             | 5                          | /                                      |
| CT33083            | 0              | 9                              | 2                             | 5                          | /                                      |
| CG2663             | 0              | 8                              | 2                             | 5                          | /                                      |
| Past1              | 0              | 8                              | 2                             | 5                          | /                                      |
| Got1               | 0              | 8                              | 2                             | 5                          | /                                      |
| RpL23              | 0              | 8                              | 2                             | 5                          | /                                      |
| betaTub97EF        | 0              | 7                              | 3                             | 5                          | /                                      |
| CG5364             | 0              | 7                              | 3                             | 5                          | /                                      |
| S-Lap2             | 0              | 7                              | 3                             | 5                          | /                                      |
| eEF1beta           | 0              | 7                              | 3                             | 5                          | /                                      |
| RFeSP-RA           | 0              | 7                              | 3                             | 5                          | /                                      |
| cora               | 0              | 2                              | 7                             | 5                          | /                                      |
| axo                | 0              | 10                             | 0                             | 5                          | /                                      |
| CG32203-RB         | 0              | 9                              | 1                             | 5                          | /                                      |
| nrv1               | 0              | 8                              | 2                             | 5                          | /                                      |

|               |   |   |   |   |   |
|---------------|---|---|---|---|---|
| CaBP1         | 0 | 7 | 2 | 5 | / |
| RpL14         | 0 | 7 | 2 | 5 | / |
| EbpII         | 0 | 7 | 2 | 5 | / |
| CCT2          | 0 | 6 | 3 | 5 | / |
| Hsp60B        | 0 | 9 | 0 | 4 | / |
| bt            | 0 | 9 | 0 | 4 | / |
| GCS2alpha     | 0 | 9 | 0 | 4 | / |
| Inos          | 0 | 9 | 0 | 4 | / |
| RpL5          | 0 | 9 | 0 | 4 | / |
| RpL8          | 0 | 8 | 1 | 4 | / |
| VhaAC39-1     | 0 | 8 | 1 | 4 | / |
| Ost48         | 0 | 7 | 2 | 4 | / |
| CG5355        | 0 | 7 | 2 | 4 | / |
| CT40966       | 0 | 7 | 2 | 4 | / |
| RpL26         | 0 | 7 | 2 | 4 | / |
| CG9911        | 0 | 6 | 2 | 4 | / |
| BEST:CK00496  | 0 | 6 | 2 | 4 | / |
| CG4692        | 0 | 6 | 2 | 4 | / |
| Mp20          | 0 | 5 | 3 | 4 | / |
| fau           | 0 | 2 | 6 | 4 | / |
| Treh          | 0 | 8 | 0 | 4 | / |
| Mpcp1         | 0 | 8 | 0 | 4 | / |
| Prosalph6     | 0 | 8 | 0 | 4 | / |
| CCT8          | 0 | 7 | 1 | 4 | / |
| CT41369       | 0 | 7 | 1 | 4 | / |
| CG5009        | 0 | 7 | 1 | 4 | / |
| Spase25       | 0 | 7 | 1 | 4 | / |
| Calr          | 0 | 6 | 2 | 4 | / |
| hts           | 0 | 6 | 2 | 4 | / |
| Hsp23         | 0 | 6 | 2 | 4 | / |
| BcDNA:LP12049 | 0 | 6 | 2 | 4 | / |
| Rpt2          | 0 | 6 | 2 | 4 | / |
| PMCA          | 0 | 6 | 2 | 4 | / |
| Eip55E        | 0 | 6 | 2 | 4 | / |
| RpL15         | 0 | 6 | 2 | 4 | / |
| mil           | 0 | 5 | 2 | 4 | / |
| lectin-46Ca   | 0 | 5 | 2 | 4 | / |
| Ran           | 0 | 5 | 2 | 4 | / |
| Pdi           | 0 | 5 | 2 | 4 | / |
| RpS13         | 0 | 3 | 4 | 4 | / |
| alphaCOP      | 0 | 7 | 0 | 3 | / |
| Sc2-RA        | 0 | 7 | 0 | 3 | / |
| CG9314        | 0 | 7 | 0 | 3 | / |

|              |   |   |   |   |   |
|--------------|---|---|---|---|---|
| eIF2gamma    | 0 | 7 | 0 | 3 | / |
| CG34051-RA   | 0 | 7 | 0 | 3 | / |
| Hsp68        | 0 | 7 | 0 | 3 | / |
| Jafrac2      | 0 | 7 | 0 | 3 | / |
| Qsox2        | 0 | 6 | 1 | 3 | / |
| Aats-gly-RB  | 0 | 6 | 1 | 3 | / |
| eIF3a        | 0 | 5 | 2 | 3 | / |
| CG5261       | 0 | 5 | 2 | 3 | / |
| Rab11        | 0 | 5 | 2 | 3 | / |
| RpS23        | 0 | 4 | 2 | 3 | / |
| Rpn3         | 0 | 4 | 2 | 3 | / |
| BEST:GH13953 | 0 | 2 | 4 | 3 | / |
| CCT3         | 0 | 6 | 0 | 3 | / |
| Alp4         | 0 | 6 | 0 | 3 | / |
| Rpn6         | 0 | 6 | 0 | 3 | / |
| sls          | 0 | 6 | 0 | 3 | / |
| Cyp4d14      | 0 | 6 | 0 | 3 | / |
| Shmt         | 0 | 6 | 0 | 3 | / |
| ATPsynbetaL  | 0 | 6 | 0 | 3 | / |
| MSBP         | 0 | 6 | 0 | 3 | / |
| AnxB9        | 0 | 5 | 1 | 3 | / |
| Cyp312a1     | 0 | 5 | 1 | 3 | / |
| Jheh2        | 0 | 5 | 1 | 3 | / |
| Pebp1        | 0 | 5 | 1 | 3 | / |
| zda          | 0 | 5 | 1 | 3 | / |
| Irp-1B       | 0 | 5 | 1 | 3 | / |
| RpS19a       | 0 | 5 | 1 | 3 | / |
| Vap33        | 0 | 5 | 1 | 3 | / |
| mesh         | 0 | 5 | 1 | 3 | / |
| blanks       | 0 | 5 | 1 | 3 | / |
| twr          | 0 | 5 | 1 | 3 | / |
| Kr-h2        | 0 | 5 | 1 | 3 | / |
| CG6071       | 0 | 5 | 1 | 3 | / |
| CG9997       | 0 | 5 | 1 | 3 | / |
| eIF4E1       | 0 | 5 | 1 | 3 | / |
| Tctp         | 0 | 4 | 2 | 3 | / |
| CG1902       | 0 | 4 | 2 | 3 | / |
| Sfp24F       | 0 | 4 | 2 | 3 | / |
| Pka-R2       | 0 | 4 | 2 | 3 | / |
| RpL10        | 0 | 4 | 2 | 3 | / |
| RpS25        | 0 | 4 | 2 | 3 | / |
| CG5174       | 0 | 4 | 2 | 3 | / |
| 142335_at    | 0 | 3 | 2 | 3 | / |

|             |    |     |    |    |       |
|-------------|----|-----|----|----|-------|
| CG31680     | 0  | 3   | 2  | 3  | /     |
| RpLP2       | 0  | 2   | 3  | 3  | /     |
| LamC        | 0  | 2   | 3  | 3  | /     |
| CG1648      | 0  | 1   | 4  | 3  | /     |
| CG45076     | 0  | 0   | 5  | 2  | /     |
| Obp44a      | 1  | 33  | 3  | 18 | 18.00 |
| alpha-Spec  | 1  | 24  | 4  | 14 | 14.09 |
| RpL19       | 1  | 26  | 1  | 13 | 13.39 |
| CG17093     | 3  | 54  | 12 | 33 | 11.04 |
| Fatp        | 1  | 13  | 2  | 8  | 7.97  |
| Tm1         | 3  | 28  | 17 | 22 | 7.40  |
| CG5845      | 1  | 10  | 5  | 7  | 7.29  |
| Mlc2        | 1  | 3   | 10 | 6  | 6.40  |
| Uba1        | 1  | 13  | 0  | 7  | 6.73  |
| exu         | 1  | 12  | 2  | 7  | 6.60  |
| Mal-A1      | 1  | 11  | 2  | 6  | 6.11  |
| GstD1       | 1  | 9   | 2  | 6  | 5.57  |
| Mhc         | 17 | 121 | 56 | 89 | 5.22  |
| alphaTub85E | 4  | 38  | 3  | 21 | 5.22  |
| VhaSFD      | 1  | 11  | 0  | 5  | 5.29  |
| Cpr         | 1  | 11  | 0  | 5  | 5.29  |
| Dmel\CG4706 | 1  | 9   | 2  | 5  | 5.15  |
| Mpcp2       | 2  | 14  | 4  | 9  | 4.64  |
| Dmel\CG4546 | 2  | 11  | 7  | 9  | 4.30  |
| Act79B      | 12 | 80  | 23 | 51 | 4.29  |
| Gdi         | 2  | 14  | 2  | 8  | 4.23  |
| CG10407-RA  | 1  | 9   | 0  | 4  | 4.33  |
| HIP         | 1  | 6   | 2  | 4  | 4.12  |
| 38D.23      | 1  | 6   | 2  | 4  | 4.12  |
| RpS18       | 1  | 6   | 2  | 4  | 4.12  |
| ATPsynD     | 1  | 6   | 2  | 4  | 4.12  |
| His4        | 1  | 5   | 3  | 4  | 4.06  |
| CG6663-RA   | 19 | 119 | 36 | 78 | 4.09  |
| up          | 2  | 12  | 4  | 8  | 3.92  |
| Prx2540-1   | 2  | 8   | 7  | 8  | 3.78  |
| CG17097     | 13 | 76  | 25 | 50 | 3.88  |
| ATPsyngamma | 6  | 42  | 5  | 24 | 3.94  |
| Tm2         | 3  | 15  | 7  | 11 | 3.67  |
| scpr-A      | 2  | 14  | 1  | 8  | 3.81  |
| /           | 2  | 12  | 3  | 7  | 3.71  |
| Vha100-2    | 2  | 10  | 5  | 7  | 3.64  |
| RpS7        | 2  | 9   | 6  | 7  | 3.61  |
| Trxr-1      | 1  | 8   | 0  | 4  | 3.85  |

|             |    |     |     |     |      |
|-------------|----|-----|-----|-----|------|
| CG31075     | 1  | 8   | 0   | 4   | 3.85 |
| Prosalpha4  | 1  | 6   | 2   | 4   | 3.71 |
| S-Lap7      | 1  | 6   | 2   | 4   | 3.71 |
| RpS10b      | 1  | 6   | 2   | 4   | 3.71 |
| mt:CoII     | 1  | 6   | 2   | 4   | 3.71 |
| Ebp         | 6  | 22  | 19  | 21  | 3.43 |
| RpS4        | 2  | 14  | 0   | 7   | 3.61 |
| CG4847-RD   | 2  | 13  | 2   | 7   | 3.54 |
| Acp36DE     | 66 | 309 | 128 | 218 | 3.31 |
| Psa         | 2  | 11  | 2   | 7   | 3.26 |
| CG6726      | 2  | 10  | 3   | 6   | 3.23 |
| CCT7        | 1  | 7   | 0   | 3   | 3.37 |
| ND-20       | 1  | 7   | 0   | 3   | 3.37 |
| Dmel\CG9331 | 1  | 6   | 1   | 3   | 3.30 |
| loopin-1    | 1  | 5   | 2   | 3   | 3.23 |
| Mhc-RB      | 1  | 5   | 2   | 3   | 3.23 |
| CG34130-RA  | 1  | 4   | 2   | 3   | 3.16 |
| Cyp4g1      | 3  | 14  | 4   | 9   | 3.09 |
| Spn38F      | 9  | 39  | 15  | 27  | 3.02 |
| CG17242     | 2  | 11  | 2   | 6   | 3.06 |
| UQCR-C1     | 5  | 27  | 3   | 15  | 3.02 |
| Acp76A      | 5  | 24  | 6   | 15  | 2.98 |
| lectin-29Ca | 5  | 19  | 10  | 15  | 2.91 |
| RpLP0       | 3  | 11  | 7   | 9   | 2.86 |
| Cat         | 4  | 15  | 7   | 11  | 2.75 |
| AOX1        | 2  | 8   | 3   | 5   | 2.75 |
| CT12127     | 1  | 6   | 0   | 3   | 2.88 |
| awd         | 1  | 5   | 1   | 3   | 2.82 |
| Rpt5        | 1  | 5   | 1   | 3   | 2.82 |
| capt        | 1  | 5   | 1   | 3   | 2.82 |
| Aats-ala    | 1  | 5   | 1   | 3   | 2.82 |
| nudC        | 1  | 5   | 1   | 3   | 2.82 |
| 6888        | 1  | 4   | 2   | 3   | 2.75 |
| Stip1       | 1  | 4   | 2   | 3   | 2.75 |
| 21430192    | 1  | 4   | 2   | 3   | 2.75 |
| Roe1        | 1  | 4   | 2   | 3   | 2.75 |
| ND-SGDH     | 1  | 3   | 2   | 3   | 2.68 |
| Sar1        | 1  | 3   | 2   | 3   | 2.68 |
| RpL4        | 4  | 16  | 4   | 10  | 2.56 |
| Arf79F      | 2  | 10  | 1   | 5   | 2.61 |
| Pgi         | 2  | 10  | 1   | 5   | 2.61 |
| Dmel\CG6287 | 2  | 8   | 2   | 5   | 2.54 |
| Dmel\CG5214 | 2  | 7   | 3   | 5   | 2.51 |

|               |    |    |    |    |      |
|---------------|----|----|----|----|------|
| Ef1alpha100E  | 7  | 29 | 7  | 18 | 2.53 |
| RpS3          | 5  | 18 | 7  | 12 | 2.49 |
| Vha44         | 4  | 13 | 5  | 9  | 2.30 |
| RpL7A         | 3  | 10 | 4  | 7  | 2.29 |
| Cyp12a5       | 2  | 7  | 2  | 5  | 2.30 |
| Dmel\CG12990  | 2  | 7  | 2  | 5  | 2.30 |
| Cyt-c1        | 2  | 6  | 3  | 5  | 2.27 |
| Mdh1          | 2  | 5  | 4  | 4  | 2.23 |
| Vha68-2       | 10 | 38 | 7  | 23 | 2.29 |
| TER94         | 6  | 20 | 7  | 13 | 2.23 |
| Acp26Aa       | 6  | 20 | 7  | 13 | 2.23 |
| 14-3-3epsilon | 4  | 13 | 5  | 9  | 2.18 |
| Gld           | 6  | 18 | 7  | 13 | 2.14 |
| Chd64         | 3  | 8  | 5  | 6  | 2.11 |
| Dmel\CG9914   | 5  | 13 | 8  | 10 | 2.08 |
| Vha26         | 7  | 20 | 9  | 15 | 2.09 |
| Ca-P60A       | 9  | 24 | 13 | 19 | 2.07 |
| CG5839        | 4  | 12 | 5  | 8  | 2.06 |
| CCT6          | 2  | 6  | 2  | 4  | 2.06 |
| Vha36-1       | 2  | 6  | 2  | 4  | 2.06 |
| Moe           | 2  | 5  | 3  | 4  | 2.03 |
| Sfp24Bb-RA    | 2  | 4  | 4  | 4  | 1.99 |
| aralar1       | 3  | 11 | 2  | 6  | 2.04 |
| Dmel\CG1532   | 3  | 7  | 5  | 6  | 1.95 |
| ATPCL         | 5  | 17 | 2  | 10 | 1.98 |
| Vha55         | 12 | 35 | 12 | 23 | 1.92 |
| PyK           | 6  | 19 | 4  | 12 | 1.95 |
| Gp93          | 6  | 14 | 8  | 11 | 1.89 |
| blw           | 20 | 46 | 29 | 38 | 1.88 |
| Hsp60C        | 17 | 46 | 17 | 32 | 1.87 |
| pAbp          | 7  | 14 | 11 | 13 | 1.80 |
| ERp60         | 5  | 14 | 4  | 9  | 1.86 |
| Ef1gamma      | 4  | 10 | 5  | 7  | 1.82 |
| Rack1         | 3  | 8  | 3  | 5  | 1.83 |
| Act57B        | 3  | 8  | 3  | 5  | 1.83 |
| BEST:GH20473  | 3  | 5  | 6  | 5  | 1.77 |
| wupA          | 2  | 8  | 0  | 4  | 1.92 |
| ND-49         | 2  | 6  | 2  | 4  | 1.86 |
| Droj2         | 2  | 5  | 2  | 4  | 1.82 |
| RpL9          | 2  | 5  | 2  | 4  | 1.82 |
| Argk          | 12 | 30 | 13 | 22 | 1.79 |
| DppIII        | 4  | 14 | 0  | 7  | 1.80 |
| Vha68-1       | 6  | 13 | 7  | 10 | 1.67 |

|               |    |    |    |    |      |
|---------------|----|----|----|----|------|
| RpS2          | 3  | 8  | 2  | 5  | 1.70 |
| Hsp27         | 3  | 6  | 4  | 5  | 1.65 |
| sta           | 3  | 6  | 4  | 5  | 1.65 |
| LManVI        | 5  | 12 | 5  | 8  | 1.65 |
| CG32919       | 5  | 12 | 5  | 8  | 1.65 |
| Hsp83         | 24 | 64 | 15 | 40 | 1.65 |
| RpL7          | 4  | 11 | 2  | 7  | 1.63 |
| eIF4A         | 4  | 10 | 3  | 6  | 1.62 |
| Mtch          | 2  | 5  | 2  | 3  | 1.62 |
| COX4          | 2  | 5  | 2  | 3  | 1.62 |
| CG5839        | 2  | 4  | 2  | 3  | 1.58 |
| tnz           | 2  | 4  | 2  | 3  | 1.58 |
| ATPsynCf6     | 2  | 3  | 3  | 3  | 1.55 |
| Spn28F        | 7  | 18 | 4  | 11 | 1.60 |
| EF2           | 10 | 23 | 8  | 16 | 1.57 |
| sesB          | 8  | 16 | 8  | 12 | 1.54 |
| Cyp12a4       | 3  | 8  | 2  | 5  | 1.56 |
| Etf-QO        | 3  | 8  | 2  | 5  | 1.56 |
| Tpi           | 3  | 7  | 2  | 5  | 1.54 |
| RpL23A        | 3  | 7  | 2  | 5  | 1.54 |
| Dmel\CG6028   | 3  | 6  | 3  | 5  | 1.51 |
| Hsc70-3       | 16 | 36 | 13 | 24 | 1.53 |
| CG5162        | 4  | 11 | 2  | 6  | 1.53 |
| COX5A         | 4  | 5  | 7  | 6  | 1.43 |
| Pdi           | 16 | 36 | 12 | 24 | 1.47 |
| Hsc70Cb       | 6  | 16 | 2  | 9  | 1.50 |
| betaTub85D    | 6  | 12 | 6  | 9  | 1.44 |
| ATPsynO       | 7  | 13 | 7  | 10 | 1.43 |
| Est-6         | 11 | 22 | 9  | 16 | 1.42 |
| betaTub56D    | 18 | 34 | 17 | 25 | 1.39 |
| Ald           | 9  | 17 | 7  | 12 | 1.37 |
| 34F4T         | 6  | 12 | 5  | 8  | 1.37 |
| Ldsdh1        | 4  | 8  | 3  | 5  | 1.37 |
| alphaTub84D   | 4  | 7  | 4  | 5  | 1.36 |
| Pgk           | 4  | 6  | 5  | 5  | 1.34 |
| BcDNA:GH10614 | 3  | 6  | 2  | 4  | 1.37 |
| RpL10Ab       | 3  | 5  | 3  | 4  | 1.35 |
| Uch           | 2  | 6  | 0  | 3  | 1.44 |
| RpS15Ab       | 2  | 5  | 1  | 3  | 1.41 |
| RpL13A        | 2  | 5  | 1  | 3  | 1.41 |
| Nipsnap       | 2  | 4  | 2  | 3  | 1.37 |
| PHGPx         | 2  | 4  | 2  | 3  | 1.37 |
| Mgstl         | 2  | 3  | 2  | 3  | 1.34 |

|             |    |    |    |    |      |
|-------------|----|----|----|----|------|
| Atpalpha    | 17 | 32 | 14 | 23 | 1.35 |
| Gapdh2      | 9  | 18 | 6  | 12 | 1.34 |
| regucalcin  | 8  | 13 | 8  | 10 | 1.30 |
| UGP         | 5  | 11 | 2  | 7  | 1.31 |
| P5CDh1      | 5  | 9  | 4  | 6  | 1.28 |
| Scsalpha    | 7  | 13 | 5  | 9  | 1.25 |
| pont        | 3  | 7  | 1  | 4  | 1.26 |
| ND-51       | 3  | 7  | 1  | 4  | 1.26 |
| eEF1alpha1  | 11 | 15 | 11 | 13 | 1.19 |
| RpS8        | 5  | 8  | 4  | 6  | 1.18 |
| Act42A      | 5  | 8  | 4  | 6  | 1.18 |
| ATPsynbeta  | 22 | 31 | 21 | 26 | 1.17 |
| Eno         | 9  | 14 | 7  | 11 | 1.17 |
| l(1)G0156   | 11 | 18 | 7  | 13 | 1.17 |
| Dmel\CG8036 | 13 | 22 | 8  | 15 | 1.17 |
| ND-75       | 10 | 15 | 7  | 11 | 1.14 |
| CG7461-RB   | 8  | 14 | 4  | 9  | 1.16 |
| 14-3-3zeta  | 8  | 11 | 7  | 9  | 1.13 |
| CG17896     | 6  | 11 | 3  | 7  | 1.16 |
| bsf         | 4  | 10 | 0  | 5  | 1.20 |
| RpL3        | 4  | 6  | 3  | 5  | 1.13 |
| Acon        | 32 | 60 | 14 | 37 | 1.15 |
| Idh3b       | 7  | 13 | 3  | 8  | 1.13 |
| Spn77Bc     | 7  | 11 | 5  | 8  | 1.11 |
| Nc73EF      | 12 | 20 | 7  | 13 | 1.12 |
| Mtpalpha    | 12 | 20 | 7  | 13 | 1.12 |
| Porin2      | 8  | 12 | 6  | 9  | 1.08 |
| Cyp1        | 8  | 10 | 7  | 9  | 1.07 |
| Hsp60A      | 17 | 30 | 7  | 19 | 1.10 |
| porin       | 9  | 12 | 7  | 9  | 1.05 |
| Pdhb        | 6  | 11 | 2  | 7  | 1.09 |
| Thiolase    | 6  | 10 | 3  | 6  | 1.08 |
| CG9509-RA   | 3  | 7  | 0  | 3  | 1.12 |
| Phb2        | 3  | 7  | 0  | 3  | 1.12 |
| tsr         | 3  | 4  | 2  | 3  | 1.05 |
| lectin-30A  | 3  | 3  | 3  | 3  | 1.03 |
| GH22814     | 8  | 12 | 5  | 8  | 1.03 |
| Dmel\CG7430 | 4  | 7  | 2  | 4  | 1.05 |
| lost        | 4  | 7  | 2  | 4  | 1.05 |
| AGBE-RA     | 4  | 7  | 2  | 4  | 1.05 |
| CG3270-RA   | 4  | 6  | 2  | 4  | 1.03 |
| RpL18       | 4  | 4  | 4  | 4  | 1.00 |
| UQCR-C2     | 13 | 19 | 7  | 13 | 1.03 |



|              |    |    |    |    |      |
|--------------|----|----|----|----|------|
| Jafrac1      | 5  | 7  | 3  | 5  | 1.00 |
| Hsc70-4      | 16 | 26 | 7  | 16 | 1.02 |
| kdn          | 27 | 39 | 15 | 27 | 1.01 |
| Dmel\CG5028  | 6  | 10 | 2  | 6  | 1.01 |
| GstS1        | 8  | 11 | 5  | 8  | 0.97 |
| BEST:GH02390 | 18 | 20 | 14 | 17 | 0.95 |
| ScsbetaA     | 10 | 12 | 7  | 9  | 0.91 |
| Adh          | 9  | 11 | 6  | 8  | 0.91 |
| RpS16        | 7  | 10 | 3  | 6  | 0.92 |
| fabp         | 7  | 10 | 3  | 6  | 0.92 |
| RpS14a       | 7  | 8  | 5  | 6  | 0.90 |
| Trap1        | 6  | 9  | 2  | 6  | 0.93 |
| l(2)37Cc     | 5  | 7  | 2  | 5  | 0.92 |
| sea          | 3  | 6  | 0  | 3  | 0.96 |
| ND-42        | 3  | 6  | 0  | 3  | 0.96 |
| Prx5         | 3  | 4  | 2  | 3  | 0.92 |
| CG4928       | 3  | 4  | 2  | 3  | 0.92 |
| Mdh2         | 14 | 16 | 7  | 12 | 0.85 |
| Prx3         | 6  | 9  | 2  | 5  | 0.86 |
| LManV        | 6  | 8  | 2  | 5  | 0.85 |
| Hsc70-5      | 11 | 15 | 3  | 9  | 0.85 |
| Gdh          | 16 | 18 | 8  | 13 | 0.83 |
| Idh          | 15 | 20 | 5  | 13 | 0.84 |
| SdhA         | 10 | 11 | 6  | 8  | 0.82 |
| Pgd          | 5  | 7  | 2  | 4  | 0.84 |
| 154229_at    | 5  | 6  | 2  | 4  | 0.82 |
| RpL13        | 4  | 7  | 0  | 3  | 0.84 |
| FASN1        | 19 | 23 | 7  | 15 | 0.80 |
| CG           | 11 | 10 | 7  | 9  | 0.78 |
| Aldh         | 7  | 7  | 4  | 5  | 0.78 |
| CG16935      | 6  | 6  | 3  | 5  | 0.76 |
| Men          | 6  | 6  | 3  | 5  | 0.76 |
| CG7010       | 5  | 6  | 2  | 4  | 0.74 |
| RpS3A        | 12 | 12 | 6  | 9  | 0.72 |
| yip2         | 7  | 7  | 3  | 5  | 0.72 |
| Gpdh         | 10 | 11 | 3  | 7  | 0.69 |
| scu          | 10 | 9  | 5  | 7  | 0.68 |
| Men-b        | 6  | 7  | 2  | 4  | 0.70 |
| Dmel\CG9629  | 6  | 7  | 2  | 4  | 0.70 |
| ND-24        | 6  | 5  | 3  | 4  | 0.68 |
| Hex-C        | 4  | 6  | 0  | 3  | 0.72 |
| Nurf-38      | 4  | 5  | 1  | 3  | 0.70 |
| GlyS         | 4  | 5  | 1  | 3  | 0.70 |

|             |     |     |     |     |      |
|-------------|-----|-----|-----|-----|------|
| Fum1        | 5   | 5   | 2   | 3   | 0.65 |
| COX5B       | 5   | 3   | 3   | 3   | 0.62 |
| Got2-RA     | 8   | 8   | 2   | 5   | 0.64 |
| Tps1        | 17  | 17  | 4   | 11  | 0.63 |
| FASN1       | 18  | 18  | 4   | 11  | 0.62 |
| Echs1       | 9   | 8   | 3   | 5   | 0.61 |
| SdhB        | 6   | 6   | 2   | 4   | 0.62 |
| GlyP        | 26  | 25  | 7   | 16  | 0.61 |
| CG3902      | 10  | 9   | 3   | 6   | 0.60 |
| mEFTu1      | 7   | 9   | 0   | 4   | 0.62 |
| CG12262     | 11  | 10  | 3   | 6   | 0.59 |
| wal         | 12  | 9   | 5   | 7   | 0.57 |
| ALT         | 17  | 13  | 6   | 10  | 0.57 |
| Gabat       | 10  | 10  | 2   | 6   | 0.56 |
| CG2907      | 5   | 4   | 2   | 3   | 0.55 |
| Dmel\CG5590 | 10  | 7   | 3   | 5   | 0.50 |
| D2hgdh      | 14  | 10  | 4   | 7   | 0.49 |
| Reg-2       | 8   | 6   | 2   | 4   | 0.46 |
| Dmel\CG7470 | 21  | 12  | 7   | 9   | 0.43 |
| ACC         | 192 | 116 | 49  | 83  | 0.43 |
| SCOT        | 10  | 6   | 2   | 4   | 0.41 |
| CG12512-RA  | 9   | 7   | 1   | 4   | 0.42 |
| Mccc1       | 13  | 6   | 4   | 5   | 0.38 |
| PCB         | 666 | 228 | 126 | 177 | 0.27 |
