# Supplementary material
Source: publisher figshare collection journal article supplement (https://gsajournals.figshare.com/articles/dataset/_/14183207)
Supplement: Supplementary file 6 [file 1]

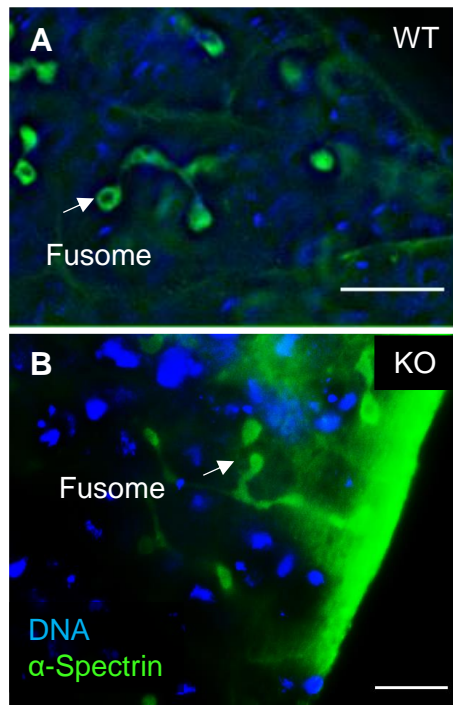

**Figure S3. Fusome (staining with  $\alpha$ -Spectrin) is not affected by lncRNA CR45362 knockout.**  
Scale bar: 10  $\mu$ m.
