# Supplementary material
Source: publisher figshare collection journal article supplement (https://gsajournals.figshare.com/articles/dataset/_/14183207)
Supplement: Supplementary file 7 [file 1]

**Table S4. RNA-binding domains in Human SPTAN1 aligned to *Drosophila*  $\alpha$ -Spectrin**

| Region | Alignment of Human SPTAN1 and <i>Drosophila</i> $\alpha$ -Spectrin<br>(RNA-binding domains are highlighted in orange) |      |                                                                                                                                                    |      |
|--------|-----------------------------------------------------------------------------------------------------------------------|------|----------------------------------------------------------------------------------------------------------------------------------------------------|------|
| 1      | Human                                                                                                                 | 140  | HRQWELLLEKMKREKGIKLLQAQKLVQYLRECEDVMDWINDK <b>EAI</b> VTSEELGQDLEHVEVLQ <b>K</b> KFE                                                               | 204  |
|        | Fly                                                                                                                   | 131  | HKLWELLLSRLAEKGLKLQQAALVLVQFLRQCEEVFWIKDKETFTVTADEFGQDLEHVEVLQ <b>R</b> KFD                                                                        | 195  |
| 2      | Human                                                                                                                 | 270  | QRFNRDVDETISWIK <b>EKE</b> QLMASDDFGRDLASVQ <b>ALLR</b> KHEGLERDLAALEDKVKALCAEADRLQ                                                                | 334  |
|        | Fly                                                                                                                   | 261  | QRFNRADETVAWIAEKDVVLSDDYGRDLASVQALQ <b>R</b> KHEGVERDLAALEDK <b>V</b> STLGAE <b>AQ</b> RLC                                                         | 325  |
| 3      | Human                                                                                                                 | 530  | AQEEKITALDEFATK <b>L</b> IQNNHYAMEDVATRDRDALLSRNALHERAMRRRAQLADSFHLQ <b>Q</b> FFRDS                                                                | 594  |
|        | Fly                                                                                                                   | 521  | AQEEKIKALDIFATKLIDGQHYAADDVAQRQMLLARRAALQ <b>E</b> KSSKRRQLLED <b>S</b> NR <b>Y</b> QQFERDC                                                        | 585  |
|        | Human                                                                                                                 | 595  | <b>DEL</b> KSWVNEKMKMTATDEAYKDP <b>S</b> NLGK <b>V</b> QKHQAFEAELS <b>AN</b> QSRIDALEKAGQKLIDVNHYAKD                                               | 659  |
|        | Fly                                                                                                                   | 586  | DETKGWISEK <b>L</b> KFATDDSYLDPTNLNGKM <b>Q</b> KHQNFEHEL <b>N</b> ANKSRIEDITNVGT <b>E</b> LIEKQHYAAD                                              | 650  |
| 4      | Human                                                                                                                 | 790  | QKLADSLRLQQLFRDVEDEETWIREKEPIAASTNR <b>G</b> KDLIGVQNLLKKHQALQAEIAGHE <b>P</b> RIKA                                                                | 854  |
|        | Fly                                                                                                                   | 781  | QHLLDSLQVQQLFRDLEDEAAWIREKEPIAASTNRGRDLIGVQN <b>L</b> IKKHQAVLAEINNHEAR <b>L</b> LN                                                                | 845  |
| 5      | Human                                                                                                                 | 1179 | VQAVQQQEVYGMMPREDTDSKTASFWKSARLMVHTVATFNSIK <b>E</b> LNERWRS <b>L</b> QQLAEERS <b>Q</b> LLGS                                                       | 1243 |
|        | Fly                                                                                                                   | 1145 | -----QTE-----AALKIQT-----QMQDLNEKWN <b>N</b> LQTLTAEKASQLGS                                                                                        | 1179 |
|        | Human                                                                                                                 | 1244 | <b>A</b> HEVQRFHRDADETK <b>E</b> WIEEK <b>N</b> QALNTDNYGHDLASVQALQ <b>R</b> KHEGFERDLAALGDKVNSLGETA                                               | 1308 |
|        | Fly                                                                                                                   | 1180 | <b>A</b> HEVQRFHRDIDETKDWIAEKANALNNDDLGLKDLRSVQTLQ <b>R</b> KHEGVERDLAALRDKIRQLDETA                                                                | 1244 |
| 6      | Human                                                                                                                 | 1797 | IK <b>E</b> KKLLVGSE <b>D</b> YGRDLTG <b>V</b> QN <b>L</b> RK <b>K</b> HKRLEAEALAAHEPAIQGVLDTGKKLSDDNTIGKEEIQQR                                    | 1861 |
|        | Fly                                                                                                                   | 1760 | IK <b>E</b> KKLLVGSD <b>D</b> YGRDLTG <b>V</b> QN <b>L</b> KK <b>K</b> HKRLEAE <b>L</b> GSHEPAIQAVQ <b>E</b> AGEK <b>L</b> MDVSNLGV <b>P</b> EIEQR | 1824 |
| 7      | Human                                                                                                                 | 2057 | KDQLLA <b>A</b> KHVQSKAIEARHASLMK <b>R</b> WSQLLANSAAR <b>K</b> KK <b>L</b> LEAQ <b>S</b> HFRKVEDLFLTFAKKASAFN                                     | 2121 |
|        | Fly                                                                                                                   | 2020 | KDQLINASHAQSPAILKR <b>H</b> GDVIARWQKL <b>R</b> DA <b>S</b> TRKDRLLAMQ <b>E</b> QFRQIEELYLTFAKKASAFN                                               | 2084 |
